# Supplementary material for: Reduction of flavonoid content in honeysuckle via Erysiphe lonicerae-mediated inhibition of three essential genes in flavonoid biosynthesis pathways
Source: Front Plant Sci. 2024 Apr 16;15:1381368. doi: 10.3389/fpls.2024.1381368 (PMC11059088; doi:10.3389/fpls.2024.1381368)
Supplement: Supplementary Table 2 — Comparative analysis of secondary metabolites in honeysuckle: Infected vs Uninfected. Detailed data on differential secondary metabolites between E. lonicerae-infected and uninfected honeysuckle samples are presented. [file Table_2.xlsx]

## Sheet: Uninfection vs infection
ID	adduct	Name	VIP	Fold change	p-value	m/z	rt(min)	KEGG	Superclass	Class	Subclass	Formula
NEG_19715	[M-H]-	Quercetin 3-O-(6''-acetyl-glucoside)	1.371	15.2332	0.00326456	505.099	4.096		Phenylpropanoids and polyketides	Flavonoids	Flavonoid glycosides	C23H22O13
NEG_16994	[M-H]-	Morroniside	1.6322	11.84	0.00100831	451.146	3.949					C17H26O11
NEG_12499	[M-H]-	5-O-Feruloylquinic acid	1.05611	4.60145	9.98506e-09	367.105	3.068		Organic oxygen compounds	Organooxygen compounds	Alcohols and polyols	C17H20O9
NEG_17496	[M-H]-	Hispidulin 4'-glucoside	1.14261	4.47571	0.0148938	461.112	4.9		Phenylpropanoids and polyketides	Flavonoids	Flavonoid glycosides	C22H22O11
POS_46383	[M+H]+	PC 36:2|PC 18:1_18:1	1.37267	4.35036	9.82197e-05	786.6	13.49					C44H84NO8P
POS_17653	[M+H]+	13-Hydroxy-7,14-labdadien-6-one	1.01294	4.31578	7.57526e-05	305.247	10.117		Lipids and lipid-like molecules	Prenol lipids	Diterpenoids	C20H32O2
POS_44463	[M+H]+	PC 32:3|PC 14:0_18:3	1.31554	4.19884	0.00346085	728.521	12.333					C40H74NO8P
POS_18824	[M+H]+	Phytosphingosine	2.26576	3.99969	7.60677e-05	318.3	10.161	C12144	Organic nitrogen compounds	Organonitrogen compounds	Amines	C18H39NO3
POS_10492	[M+H]+	2,3-Dihydroxy-1-(4-hydroxy-3-methoxyphenyl)-1-propanone	4.88908	3.56391	0.00404477	213.075	1.854		Organic oxygen compounds	Organooxygen compounds	Carbonyl compounds	C10H12O5
NEG_12937	[M-H]-	Loganic acid	1.56223	3.45349	0.00547025	375.13	0.665		Lipids and lipid-like molecules	Prenol lipids	Terpene glycosides	C16H24O10
POS_45439	[M+H]+	PC 34:3|PC 16:0_18:3	2.48415	3.40892	4.23308e-05	756.552	11.926					C42H78NO8P
NEG_15887	[M-H]-	7-O-Ethylmorroniside	4.29317	3.31995	6.63271e-07	433.137	3.581					C19H30O11
NEG_11838	[M-H]-	Chlorogenic acid	1.93834	3.07086	4.27442e-06	353.088	2.29	C00852	Organic oxygen compounds	Organooxygen compounds	Alcohols and polyols	C16H18O9
POS_45354	[M+H]+	PC 34:4|PC 16:1_18:3	1.57357	3.04316	7.17785e-06	754.537	11.812					C42H76NO8P
NEG_16733	[M-H]-	Geranyl 6-O-alpha-L-arabinofuranosyl-beta-D-glucopyranoside	1.04913	2.86364	0.00208736	447.224	6.312		Lipids and lipid-like molecules	Prenol lipids	Terpene glycosides	C21H36O10
NEG_17078	[M-H]-	2-Azaniumylethyl (3-hexadecanoyloxy-2-hydroxypropyl) phosphate	1.3172	2.58524	2.35979e-05	452.279	10.696		Lipids and lipid-like molecules	Glycerophospholipids	Glycerophosphoethanolamines	C21H44NO7P
NEG_14370	[M-H]-	[2-(beta-D-Glucopyranosyloxy)-5-(methoxycarbonyl)-3-vinyl-3,4-dihydro-2H-pyran-4-yl]acetic acid	5.04388	2.55565	4.1863e-06	403.126	2.709		Lipids and lipid-like molecules	Prenol lipids	Terpene glycosides	C17H24O11
POS_3878	[M+H]+	Phenylacetaldehyde	2.01094	2.45589	0.000278988	121.065	4.218	C00601	Benzenoids	Benzene and substituted derivatives	Phenylacetaldehydes	C8H8O
NEG_4695	[M-H]-	5-Acetylsalicylic acid	2.24485	2.43431	0.00924897	179.056	4.218					C9H8O4
NEG_20883	[M-H]-	(1R,3R,4S,5R)-3-[(E)-3-(3,4-Dihydroxyphenyl)prop-2-enoyl]oxy-1,5-dihydroxy-4-[(E)-3-(3-hydroxy-4-methoxyphenyl)prop-2-enoyl]oxycyclohexane-1-carboxylic acid	1.13843	2.42474	0.000790886	529.137	4.259		Organic oxygen compounds	Organooxygen compounds	Alcohols and polyols	C26H26O12
NEG_18658	[M-H]-	LPG 16:0	1.63491	2.40396	0.000250152	483.273	10.226					C22H45O9P
POS_28724	[M+Na]+	Methyl (1R,4aS,8S,8aS)-3-methoxy-1-methyl-8-[(2S,3R,4S,5S,6R)-3,4,5-trihydroxy-6-(hydroxymethyl)oxan-2-yl]oxy-1,3,4,4a,8,8a-hexahydropyrano[3,4-c]pyran-5-carboxylate	2.06878	2.31021	0.0027497	443.152	3.958		Organic oxygen compounds	Organooxygen compounds	Carbohydrates and carbohydrate conjugates	C18H28O11
POS_5895	[M+H]+	p-Coumaraldehyde	2.18498	2.26882	0.000573399	149.059	4.217	C05608	Phenylpropanoids and polyketides	Cinnamaldehydes		C9H8O2
POS_33798	[M+H]+	(2-Hydroxy-3-octadeca-9,12,15-trienoyloxypropyl) 2-(trimethylazaniumyl)ethyl phosphate	3.1141	2.19969	0.000137182	518.323	9.845		Lipids and lipid-like molecules	Glycerophospholipids	Glycerophosphocholines	C26H48NO7P
POS_24625	[M+H]+	Hexose + C11H12O4	1.46789	2.18095	0.000184509	389.143	4.22		Lipids and lipid-like molecules	Prenol lipids	Terpene glycosides	C17H24O10
NEG_18317	[M]-	1-(9Z,12Z-Octadecadienoyl)-2-hydroxy-sn-glycero-3-phosphoethanolamine	1.17872	2.11047	0.000967779	476.279	10.419		Lipids and lipid-like molecules	Fatty Acyls	Lineolic acids and derivatives	[C23H43NO7P]-
NEG_2714	[M-H]-	D-Malate	1.09268	1.95312	5.19853e-05	133.013	0.536	C00497	Organic acids and derivatives	Hydroxy acids and derivatives	Beta hydroxy acids and derivatives	C4H6O5
NEG_22436	[M+HCOO]-	(2-Hydroxy-3-octadeca-9,12-dienoyloxypropyl) 2-(trimethylazaniumyl)ethyl phosphate	1.24701	1.89976	0.00756157	564.332	10.406		Lipids and lipid-like molecules	Glycerophospholipids	Glycerophosphocholines	C26H50NO7P
NEG_17603	[M-H]-	Isoquercitrin	2.23835	1.88732	0.00562323	463.09	4.169	C05623	Phenylpropanoids and polyketides	Flavonoids	Flavonoid glycosides	C21H20O12
NEG_24051	[M-2H]-	Rutin	2.32748	1.86919	0.000286528	609.147	4.183	C05625	Phenylpropanoids and polyketides	Flavonoids	Flavonoid glycosides	C27H30O16
POS_11483	[M+H]+	Sarracenin	1.21076	1.80861	4.42441e-05	227.091	3.582					C11H14O5
POS_3811	[M-H2O+H]+	2-Amino-1-phenylethanol	1.16584	1.78842	9.20144e-05	120.081	1.486	C02735	Organic nitrogen compounds	Organonitrogen compounds	Amines	C8H11NO
POS_38125	[M+H-H2O]+	3-{12-hydroxy-12-[5'-(1-hydroxydodecyl)-[2,2'-bioxolan]-5-yl]dodecyl}-5-methyl-5H-furan-2-one	1.58664	1.77906	0.000282412	589.481	12.273					C37H66O6
POS_7230	[M+H]+	(S)-Suspensaside	1.79455	1.77578	1.0168e-05	167.07	4.091		Organic oxygen compounds	Organooxygen compounds	Carbonyl compounds	C9H10O3
POS_19651	[M+H]+	3-Hydroxy-3',4',5'-trimethoxyflavone	6.58579	1.72741	0.00304658	329.101	8.019		Phenylpropanoids and polyketides	Flavonoids	Flavones	C18H16O6
NEG_5255	[M-H]-	Quinic acid	1.99158	1.70655	0.012218	191.055	2.291	C00296	Organic oxygen compounds	Organooxygen compounds	Alcohols and polyols	C7H12O6
NEG_13533	[M-H]-	Lactose	2.52202	1.6569	2.63949e-05	387.116	0.616					C12H22O11
NEG_8827	[M-H]-	Luteolin	2.07848	1.62104	0.00301289	285.042	5.492	C01514	Phenylpropanoids and polyketides	Flavonoids	Flavones	C15H10O6
NEG_16012	[M+FA-H]-	Loganin	1.60065	1.57419	0.0420462	435.151	3.785		Lipids and lipid-like molecules	Prenol lipids	Terpene glycosides	C17H26O10
POS_40418	[M+NH4]+	DG 36:6|DG 18:3_18:3	1.72466	1.57058	0.040821	630.507	12.568					C39H64O5
POS_34209	[M+H]+	1-Stearoyl-sn-glycero-3-phosphocholine	2.81988	1.55863	6.92813e-05	524.371	11.237	C04230	Lipids and lipid-like molecules	Glycerophospholipids	Glycerophosphocholines	C26H54NO7P
NEG_11305	[M-H]-	Sucrose	3.54816	1.36323	0.000126234	341.11	0.616	C00089	Organic oxygen compounds	Organooxygen compounds	Carbohydrates and carbohydrate conjugates	C12H22O11
NEG_20235	[M-H]-	Isochlorogenic acid b	2.17275	1.35447	0.0157455	515.121	3.729		Organic oxygen compounds	Organooxygen compounds	Alcohols and polyols
NEG_20238	[M-H]-	Isochlorogenic acid A	3.37547	1.35311	0.000329319	515.121	3.33		Organic oxygen compounds	Organooxygen compounds	Alcohols and polyols	C25H24O12
POS_7053	[M+H-H2O]+	Homovanillic acid	1.179	1.3449	0.00147793	165.054	4.983	C05582	Benzenoids	Phenols	Methoxyphenols	C9H10O4
POS_18634	[M+H]+	2-Aminooctadec-8-ene-1,3,4-triol	1.25628	1.25918	0.0312446	316.284	9.805		Organic nitrogen compounds	Organonitrogen compounds	Amines	C18H37NO3
POS_43308	[M+H]+	HexCer 34:3;2O|HexCer 18:2;2O/16:1	1.66937	1.23932	0.0472986	696.541	12.271					C40H73NO8
POS_32296	[M+H]+	1-Palmitoylphosphatidylcholine	2.95273	1.19347	0.0371163	496.338	10.689		Lipids and lipid-like molecules	Glycerophospholipids	Glycerophosphocholines	C24H50NO7P
POS_26731	[M+Na]+	(1S,2R,4aR,8aR)-1-Acetoxy-7-isopropylidene-1,4a-dimethyl-6-oxodecahydro-2-naphthalenyl 2,3-dimethyl-2-oxiranecarboxylate	1.01287	0.834636	0.00910759	415.211	7.915		Lipids and lipid-like molecules	Prenol lipids	Sesquiterpenoids	C22H32O6
POS_18376	[M-H2O+H]+	2,4-Dihydroxyheptadecyl acetate	2.74474	0.793935	0.000877731	313.273	11.05		Lipids and lipid-like molecules	Fatty Acyls	Fatty alcohols	C19H38O4
POS_38343	[M+H]+	Pheophorbide A	3.68514	0.766281	0.00101967	593.273	10.872		Organoheterocyclic compounds	Tetrapyrroles and derivatives	Chlorins	C35H36N4O5
POS_2621	[M]+	Choline	2.55153	0.732971	0.0074955	104.107	0.604	C00114	Organic nitrogen compounds	Organonitrogen compounds	Quaternary ammonium salts	[C5H14NO]+
NEG_19876	[M-H]-	LPG 18:2	2.19855	0.706916	0.0336772	507.273	10.11					C24H45O9P
POS_27786	[M+H]+	All-rac-3,4-Dehydro-alpha-tocopherol	4.23825	0.681128	0.000427674	429.372	12.185					C29H48O2
POS_18545	[M+H]+	Pergolide	1.62399	0.678376	9.9716e-05	315.192	8.192	C07425	Organoheterocyclic compounds	Quinolines and derivatives	Indoloquinolines	C19H26N2S
POS_19323	[M+H]+	Linoleoyl ethanolamide	1.01968	0.66648	0.00111898	324.289	10.562		Organic nitrogen compounds	Organonitrogen compounds	Amines	C20H37NO2
POS_34090	[M+H]+	1-(9Z-Octadecenoyl)-sn-glycero-3-phosphocholine	3.71423	0.6307	0.00265555	522.356	10.811	C04230	Lipids and lipid-like molecules	Glycerophospholipids	Glycerophosphocholines	C26H52NO7P
POS_26098	[M+H]+	Methyl 4-[(3R,5R,10S,12S,13R)-3,12-dihydroxy-10,13-dimethyl-2,3,4,5,6,7,8,9,11,12,14,15,16,17-tetradecahydro-1H-cyclopenta[a]phenanthren-17-yl]pentanoate	1.31486	0.582178	6.22094e-06	407.315	11.411		Lipids and lipid-like molecules	Steroids and steroid derivatives	Bile acids, alcohols and derivatives	C25H42O4
POS_4315	[M+H]+	4-Hydroxy-6-methyl-2-pyrone	2.63491	0.565188	8.72104e-09	127.039	3.67		Organoheterocyclic compounds	Pyrans	Pyranones and derivatives	C6H6O3
POS_17223	[M+H]+	Palmitoylethanolamide	1.04421	0.551209	0.000456769	300.289	10.827	C15572	Organic acids and derivatives	Carboximidic acids and derivatives	Carboximidic acids	C18H37NO2
NEG_2995	[M-H]-	3,4-Dihydroxybenzaldehyde	1.91199	0.539844	1.7559e-06	137.023	2.03	C16700	Organic oxygen compounds	Organooxygen compounds	Carbonyl compounds	C7H6O3
NEG_14371	[M-H]-	Sweroside	5.42771	0.537473	6.55975e-07	403.126	3.668		Organic oxygen compounds	Organooxygen compounds	Carbohydrates and carbohydrate conjugates	C16H22O9
POS_20184	[M+H]+	Strychnine sulfate	1.05224	0.531841	0.00016707	335.182	6.415					C21H22N2O2.1/2H2SO4
POS_21578	[M+H]+	5-(5-Methoxycarbonyl-5,8a-dimethyl-2-methylidene-3,4,4a,6,7,8-hexahydro-1H-naphthalen-1-yl)-3-methylpentanoic acid	1.72511	0.528198	7.72299e-06	351.252	9.072		Lipids and lipid-like molecules	Prenol lipids	Diterpenoids	C21H34O4
NEG_8445	[M-H]-	gamma-Linolenic acid	3.81999	0.502458	1.99375e-06	277.218	10.122	C06426	Lipids and lipid-like molecules	Fatty Acyls	Lineolic acids and derivatives	C18H30O2
NEG_8538	[M-H]-	Linoleic acid	1.23228	0.46218	3.2923e-06	279.233	11.632	C01595	Lipids and lipid-like molecules	Fatty Acyls	Lineolic acids and derivatives	C18H32O2
POS_21376	[M+H]+	8-[5-(Acetyloxy)-3-methylpentyl]octahydro-4,4,8a-trimethyl-7-methylene-2(1H)-naphthalenone	1.0552	0.458132	0.0293447	349.273	10.297		Lipids and lipid-like molecules	Prenol lipids	Diterpenoids	C22H36O3
NEG_7688	[M-H]-	Palmitic acid	3.58487	0.400312	6.81236e-08	255.233	10.81	C00249	Lipids and lipid-like molecules	Fatty Acyls	Fatty acids and conjugates	C16H32O2
POS_23997	[M+Na]+	3-(2-Glucosyloxy-4-methoxyphenyl)propanoic acid	1.14122	0.382348	2.13282e-07	381.114	3.671		Organic oxygen compounds	Organooxygen compounds	Carbohydrates and carbohydrate conjugates	C16H22O9
POS_14025	[M-3H2O+H]+	8-Hydroxy-9,10-epoxystearic acid	1.67975	0.380847	2.09797e-07	261.22	8.79		Lipids and lipid-like molecules	Fatty Acyls	Lineolic acids and derivatives	C18H34O4
POS_21527	[M+H]+	Vinpocetine	1.78006	0.373636	3.15667e-06	351.213	6.115		Alkaloids and derivatives	Eburnan-type alkaloids		C22H26N2O2
POS_10189	[M-H2O+H]+	5-(6-Methyl-6-hydroxyoctyl)furan-2(5H)-one	1.24038	0.35201	1.11196e-07	209.153	8.79		Organoheterocyclic compounds	Dihydrofurans	Furanones	C13H22O3
NEG_22099	[M-H]-	Dronedarone	1.38031	0.348931	1.97315e-07	555.285	10.245		Organic oxygen compounds	Organooxygen compounds	Carbonyl compounds	C31H44N2O5S
POS_18704	[M+Na]+	(5R)-5-Hydroxy-1-(4-hydroxy-3-methoxyphenyl)decan-3-one	1.2007	0.343909	1.5583e-05	317.172	7.459		Benzenoids	Phenols	Methoxyphenols	C17H26O4
POS_16268	[M+H]+	Estriol	1.17328	0.334474	4.45782e-07	289.179	6.261	C05141	Lipids and lipid-like molecules	Steroids and steroid derivatives	Estrane steroids	C18H24O3
POS_16422	[M+H]+	h_92_Oxabolone	1.89424	0.284193	2.99631e-06	291.195	6.276		Lipids and lipid-like molecules	Steroids and steroid derivatives	Estrane steroids	C18H26O3
NEG_9938	[M-H]-	9-Hydroperoxy-, (Z,Z,Z)-10,12,15-octadecatrienoic acid	1.16009	0.276777	6.94447e-05	309.208	6.474		Lipids and lipid-like molecules	Fatty Acyls	Lineolic acids and derivatives	C18H30O4
NEG_9332	[M-H]1-	9-Hydroxy-10E,12Z-octadecadienoic acid	8.30368	0.271382	4.418e-08	295.229	8.781		Lipids and lipid-like molecules	Fatty Acyls	Lineolic acids and derivatives	C18H32O3
NEG_7037	[M-H]-	Dihydroartemisinic acid	1.6577	0.231807	2.9416e-08	235.171	8.277					C15H24O2
POS_36279	[M+H]+	5,7-dihydroxy-6,8-dimethyl-2-pentacosylchromen-4-one	1.21437	0.224687	1.86087e-06	557.454	11.639					C36H60O4

## Sheet: Superclass
Superclass	NO. of identified metabolites
Lipids and lipid-like molecules	186
Undefined	129
Phenylpropanoids and polyketides	107
Organoheterocyclic compounds	76
Benzenoids	73
Organic oxygen compounds	72
Organic acids and derivatives	60
Organic nitrogen compounds	11
Alkaloids and derivatives	9
Nucleosides, nucleotides, and analogues	7
Lignans, neolignans and related compounds	3
Organosulfur compounds	2
Homogeneous non-metal compounds	1
